Articles of interest in other COB journals

From *Journal of Cell Science*

**Rock2 controls TGF $\beta$  signaling and inhibits mesoderm induction in zebrafish embryos**

Yu Zhang, Xiang Li, Jingjing Qi, Jialu Wang, Xingfeng Liu, Haiwen Zhang, Sheng-Cai Lin and Anming Meng

Zhang, Y. et al. 2009. *J. Cell Sci.* doi:10.1242/jcs.040659

**Distinct roles for isoforms of the catalytic subunit of class-IA PI3K in the regulation of behaviour of murine embryonic stem cells**

Emmajayne Kingham and Melanie Welham

Kingham, E. et al. 2009. *J. Cell Sci.* doi:10.1242/jcs.046557
